# Supplementary material for: Spherical core–shell magnetic particles constructed by main-chain palladium N-heterocyclic carbenes
Source: Royal Society of Chemistry journal article supplement (doi:10.1039/c4nr07330d), 2015-01-01
Supplement: c4nr07330d1.pdf [file c4nr07330d1.pdf]

## Supporting Information

*for*

### The Spherical Core-shell Magnetic Particles Constructed by Main-chain Palladium N-Heterocyclic Carbenes

*Huaixia Zhao,<sup>a, b</sup> Liuyi Li,<sup>a</sup> Jinyun Wang,<sup>a</sup> Ruihu Wang<sup>\*a</sup>*

<sup>a</sup> State Key Laboratory of Structural Chemistry, Fujian Institute of Research on the Structure of Matter, Chinese Academy of Sciences, Fuzhou, Fujian, 350002, China

<sup>b</sup> University of Chinese Academy of Sciences, Beijing 100049, China

*E-mail: [ruihu@fjirsm.ac.cn](mailto:ruihu@fjirsm.ac.cn)*

#### Contents

|                                                                                                                                   |    |
|-----------------------------------------------------------------------------------------------------------------------------------|----|
| 1) <b>Figure S1</b> Calculated energy level in TIPT-Cl.....                                                                       | S2 |
| 2) <b>Figure S2</b> Typical SEM images of PNP2 in concentration increment and decrement of TIPB-Cl and Pd(OAc) <sub>2</sub> ..... | S3 |
| 3) <b>Figure S3</b> Magnetic separation of Fe <sub>3</sub> O <sub>4</sub> @PNP by the external magnet.....                        | S3 |
| 4) <b>Figure S4</b> XRD patterns of Fe <sub>3</sub> O <sub>4</sub> @PNP and bare Fe <sub>3</sub> O <sub>4</sub> NPs.....          | S3 |
| 5) <b>Figure S5</b> Solid state <sup>13</sup> C NMR spectra of Fe <sub>3</sub> O <sub>4</sub> @PNP.....                           | S4 |
| 6) <b>Figure S6</b> IR spectra of TIPT-Cl, TIPB-Cl and Fe <sub>3</sub> O <sub>4</sub> @PNP.....                                   | S4 |
| 7) <b>Figure S7</b> TG-MS curves of Fe <sub>3</sub> O <sub>4</sub> @PNP.....                                                      | S5 |
| 8) <b>Figure S8</b> The catalytic activity of the palladium NHC particles.....                                                    | S5 |

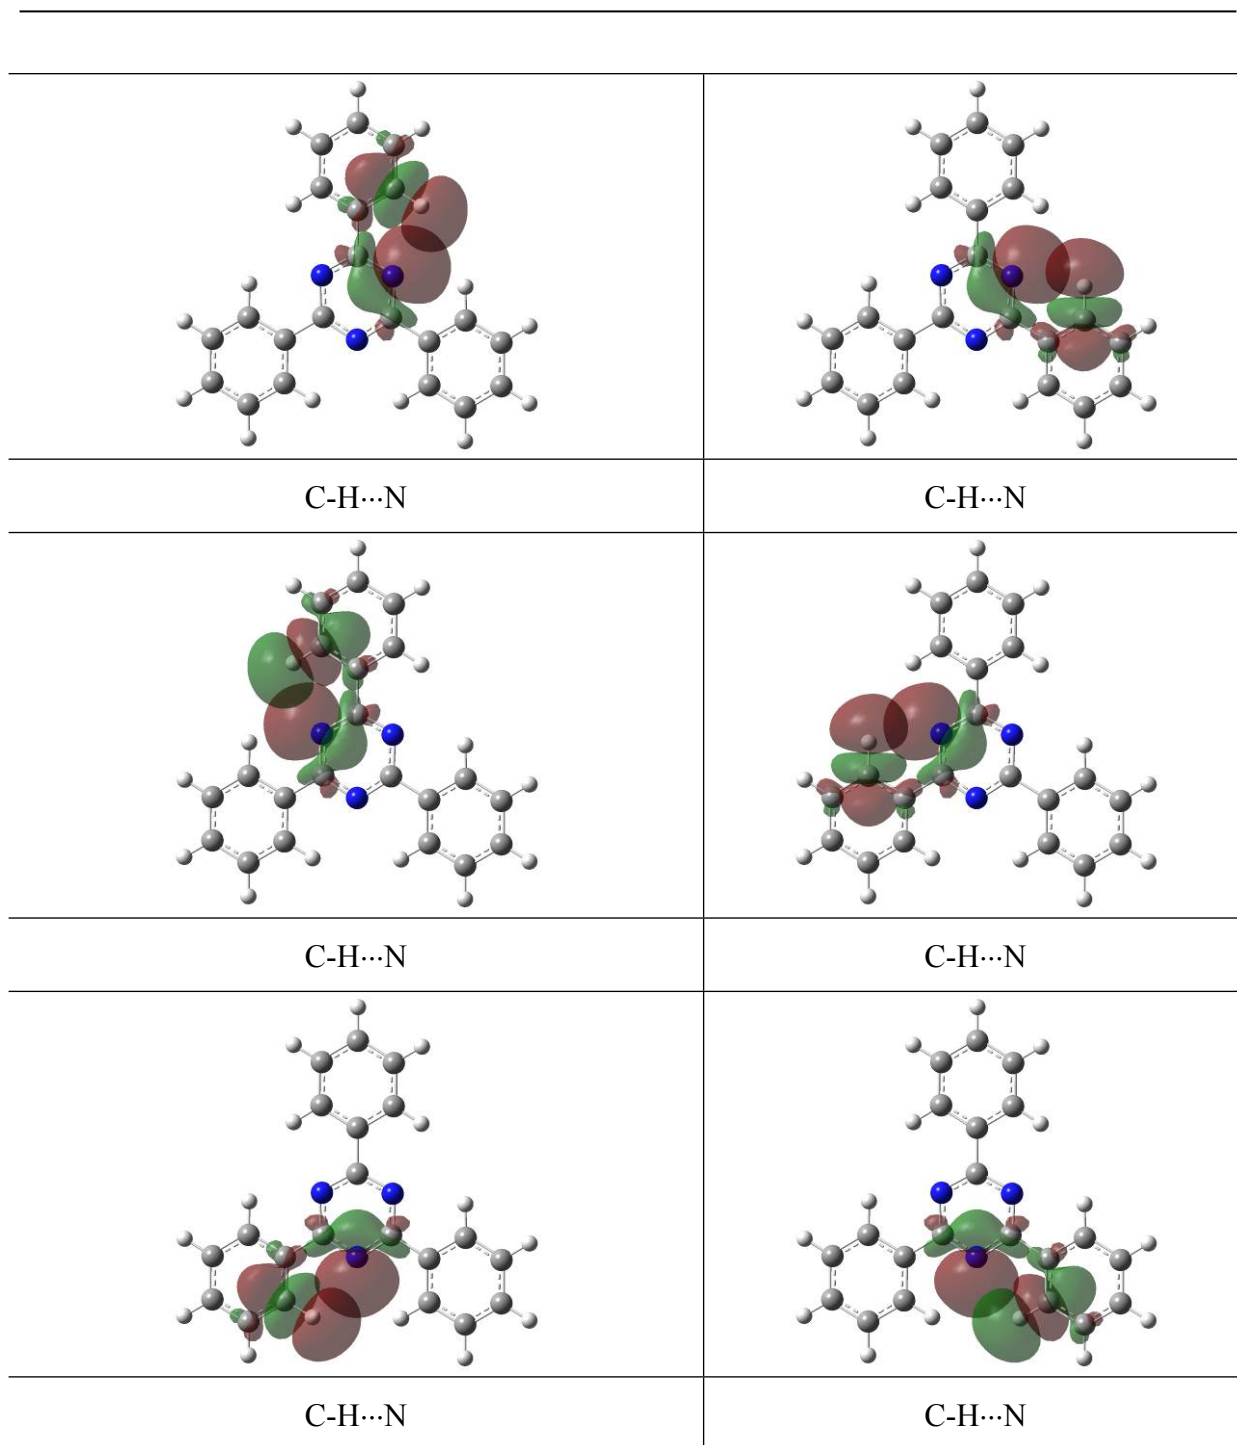

**Figure S1** The plots of hydrogen bonds between lone pair electron of N atom on the central triazine ring and anti-bond of C-H on the peripheral rings in TIPT-Cl.

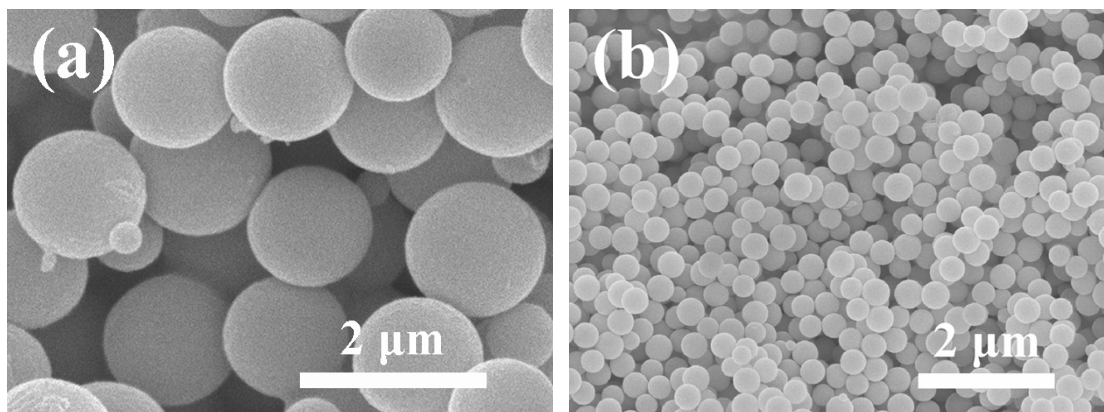

**Figure S2** Typical SEM images of PNP2 in concentration increment (a) and decrement (b) of TIPB-Cl and Pd(OAc)<sub>2</sub>.

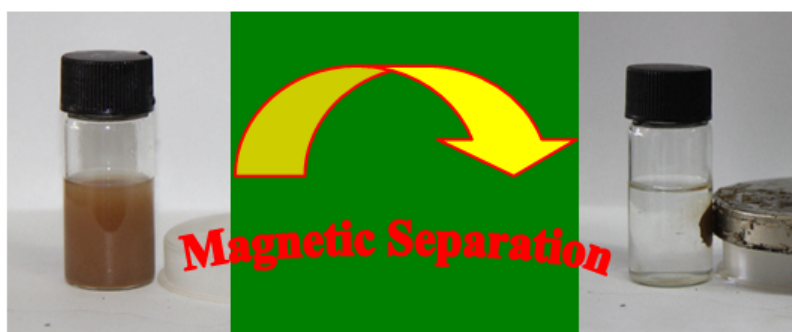

**Figure S3** Magnetic separation of Fe<sub>3</sub>O<sub>4</sub>@PNP by the external magnet.

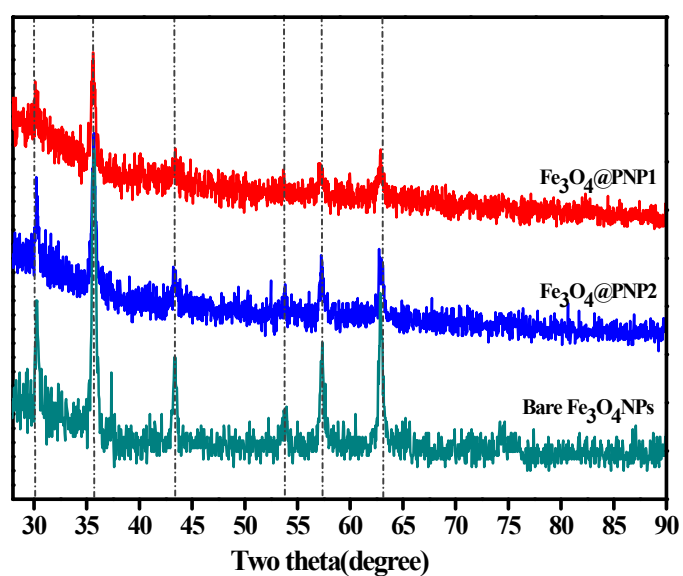

**Figure S4** XRD patterns of Fe<sub>3</sub>O<sub>4</sub>@PNP1, Fe<sub>3</sub>O<sub>4</sub>@PNP2 and bare Fe<sub>3</sub>O<sub>4</sub> NPs.

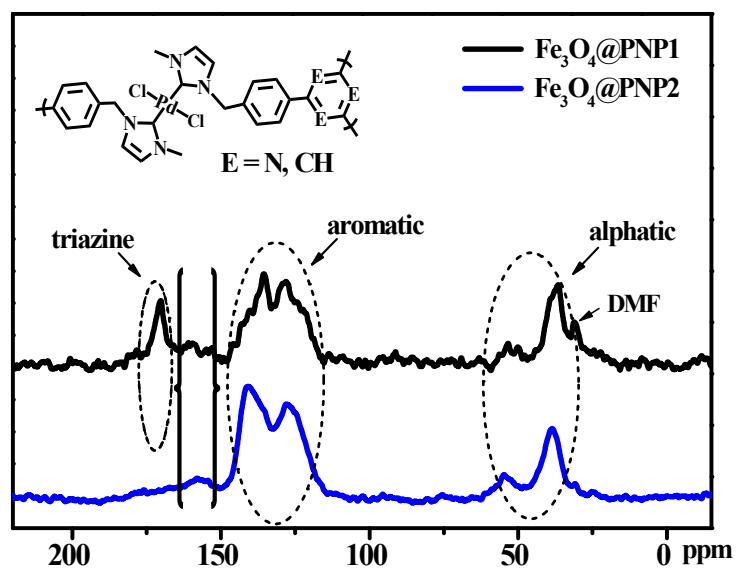

**Figure S5** Solid state  $^{13}\text{C}$  NMR spectra of  $\text{Fe}_3\text{O}_4@PNP1$  and  $\text{Fe}_3\text{O}_4@PNP2$ .

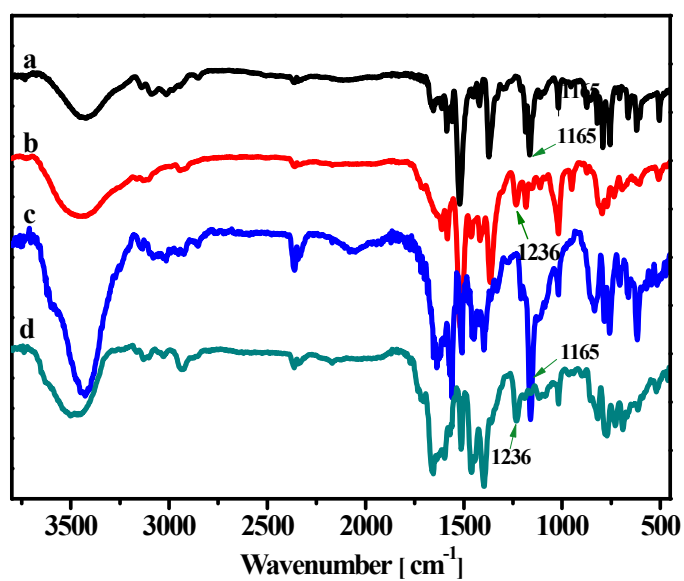

**Figure S6** IR spectra of TIPT-Cl (a),  $\text{Fe}_3\text{O}_4@PNP1$  (b), TIPB-Cl (c) and  $\text{Fe}_3\text{O}_4@PNP1$  (d).

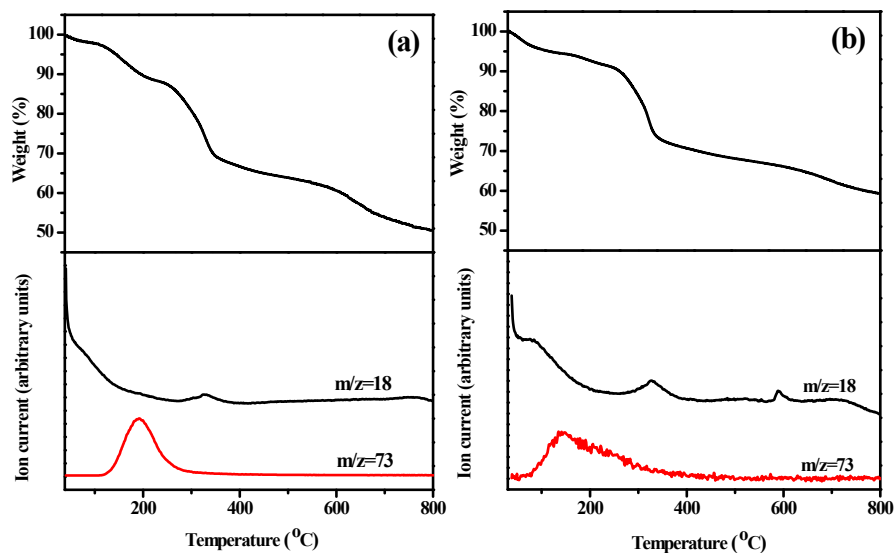

**Figure S7** TG-MS curves of  $\text{Fe}_3\text{O}_4\text{@PNP1}$  (a) and  $\text{Fe}_3\text{O}_4\text{@PNP2}$  (b).

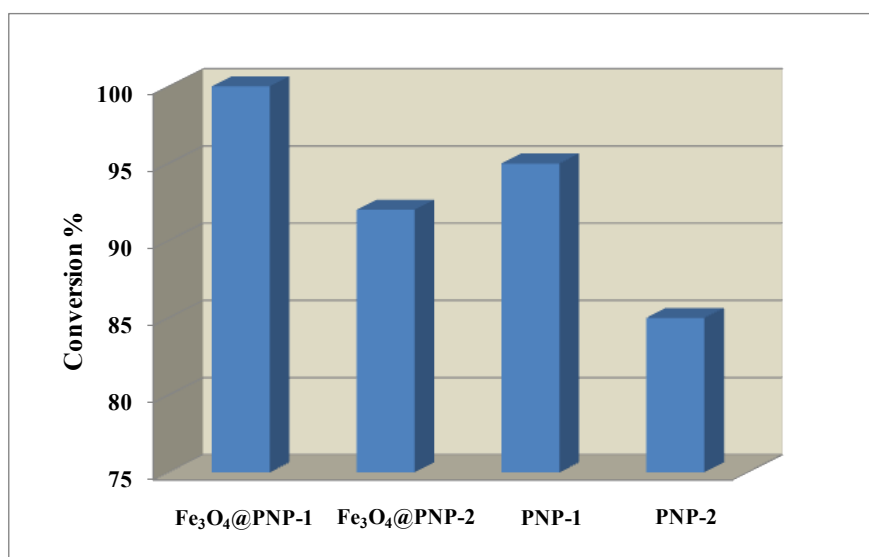

**Figure S8** The catalytic activity of the palladium NHC particles. Reaction conditions: 4-bromoacetophenone (0.50 mmol), phenylboronic acid (0.75 mmol),  $\text{K}_2\text{CO}_3$  (1.0 mmol) and  $[\text{Pd}]$  (1.0 mol%) in water (1.0 mL) and EtOH (2.0 mL) at 25 °C for 1h.
